# Supplementary material for: Shed antigen-induced blocking effect on CAR-T cells targeting Glypican-3 in Hepatocellular Carcinoma
Source: HighWire-hosted journal article supplement (doi:10.1136/jitc-2020-001875), 2021-04-01
Supplement: jitc-2020-001875supp001_data_supplement.pdf [file jitc-2020-001875supp001_data_supplement.pdf]

## Supplementary Data

### Shed antigen-induced blocking effect on CAR-T cells targeting

### Glypican-3 in hepatocellular carcinoma

Luan Sun<sup>1#</sup>, Fang Gao<sup>1#</sup>, Zhanhui Gao<sup>1,2</sup>, Lei Ao<sup>1</sup>, Na Li<sup>1</sup>, Sujuan Ma<sup>1</sup>, Meng Jia<sup>3,4</sup>,  
Nan Li<sup>5</sup>, Peihua Lu<sup>6</sup>, Beicheng Sun<sup>7</sup>, Mitchell Ho<sup>5</sup>, Shaochang Jia<sup>4\*</sup>, Tong Ding<sup>1\*</sup>, Wei  
Gao<sup>1\*</sup>

#These authors contributed equally to this work.

#### Author affiliations:

<sup>1</sup> Key Laboratory of Human Functional Genomics of Jiangsu Province, National Health Commission Key Laboratory of Antibody Techniques, School of Basic Medical Sciences, Nanjing Medical University, Nanjing, Jiangsu, P.R. China

<sup>2</sup> Department of Nephrology, The Affiliated BenQ Hospital of Nanjing Medical University, Nanjing, Jiangsu, P.R. China

<sup>3</sup> School of Chemistry and Molecular Biosciences, University of Queensland, Brisbane St Lucia, QLD 4072, Australia

<sup>4</sup> Department of Biotherapy, Nanjing Jinling Hospital, Nanjing, Jiangsu, P.R. China

<sup>5</sup> Laboratory of Molecular Biology, Center for Cancer Research, National Cancer Institute, National Institutes of Health, Bethesda, MD, USA

<sup>6</sup> Department of Medical Oncology, Wuxi People's Hospital Affiliated to Nanjing Medical University, Wuxi, Jiangsu, P.R. China

<sup>7</sup> Department of Hepatobiliary Surgery, The Affiliated Drum Tower Hospital of Nanjing University Medical School, Nanjing, Jiangsu, P.R. China

#These authors contributed equally to this work.

## Role of Shed Tumor Antigens in Immunotherapies

### 1. Materials and Methods

#### **Immunohistochemistry.**

Immunohistochemical staining of formalin-fixed and paraffin-embedded tissue sections was carried out using a two-step protocol. Briefly, 4 µm sections were deparaffinized in xylene and rehydrated through a graded alcohol series. Endogenous peroxidase activity was blocked by 10 minutes of incubation in 3% hydrogen peroxide in double distilled water. Antigen retrieval was performed by microwave treatment in citrate buffer (pH 6.0). Primary antibodies (anti-GPC3, clone SP86, Abcam, Cambridge, MA; anti-Ki-67, rabbit polyclone, Abcam, Cambridge, MA) were applied, followed by incubation at 4°C overnight. Staining was developed with peroxidase and 3,3'-diaminobenzidine tetrahydrochloride (brown reaction product) followed by counterstaining with hematoxylin. Micrographs were manually obtained and evaluated with a computerized image analysis platform using Image-Pro Plus version 5.1. The expression of GPC3 in HCC tissues was scored as a staining index (total staining intensity per unit of tissue area). The Ki-67 positive staining was counted manually, and the results were shown as the total number of positive cells in five high power fields.

#### **Flow cytometry**

Cultured cells were harvested in cell dissociation solution (Invitrogen, Carlsbad, CA), washed, and resuspended in ice-cold flow buffer (PBS containing 5% BSA). One million cells were incubated on ice with an unconjugated primary Ab (32A9 and humanized YP7) or a recombinant protein which can be recognized by a fluorescent goat Ab (Jackson ImmunoResearch Laboratories, West Grove, PA). The fluorescence

### Role of Shed Tumor Antigens in Immunotherapies

of cells was measured using a FACS Calibur or FACS Verse system (BD Biosciences, San Diego, CA).

#### **Western blotting and immunoprecipitation.**

Cell lysates or culture supernatants were mixed with loading buffer, denatured at 95°C and subjected to SDS-PAGE. The immunoprecipitation of sGPC3 in culture supernatants was performed by incubation with a biotin-labeled anti-GPC3 monoclonal Ab (mAb) overnight, followed by mixing with streptavidin-agarose beads for 2 hours at 4°C. Immune complexes were washed and subjected to immunoblotting with an anti-GPC3 Ab.

#### **Luciferase reporter assay.**

HEK293 Super TOPFlash cells were seeded into a 48-well plate. When the cells grew to 70% confluence, the full-length GPC3 plasmid (0.1 µg/well) and Renilla luciferase plasmid (0.05 µg/well) were cotransfected with or without the sGPC3 plasmid (0.1 µg/well) into cells. Twenty-four hours later, 50% Wnt3a conditioned medium (CM) was added. In some cases, cells were pre-treated with recombinant sGPC3 for 30 min before Wnt3a CM treatment. Luciferase activity was measured 24 hours later with the Dual-Luciferase Reporter Assay kit (Promega, Madison, WI) according to the manufacturer's protocol.

## Role of Shed Tumor Antigens in Immunotherapies

## 2. Supplementary Figures

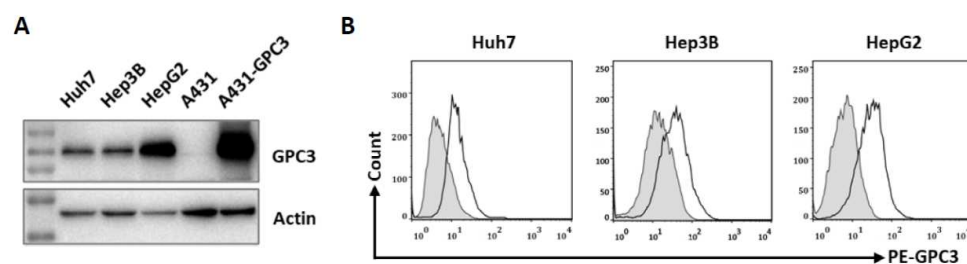

**Fig. S1. GPC3 expression in HCC cells.** (A) Measurement of GPC3 expression in tumor cell lines by western blotting. (B) Flow cytometry to measure the cell-surface expression of GPC3. Filled peak: isotype control. Open peak: GPC3.

Role of Shed Tumor Antigens in Immunotherapies

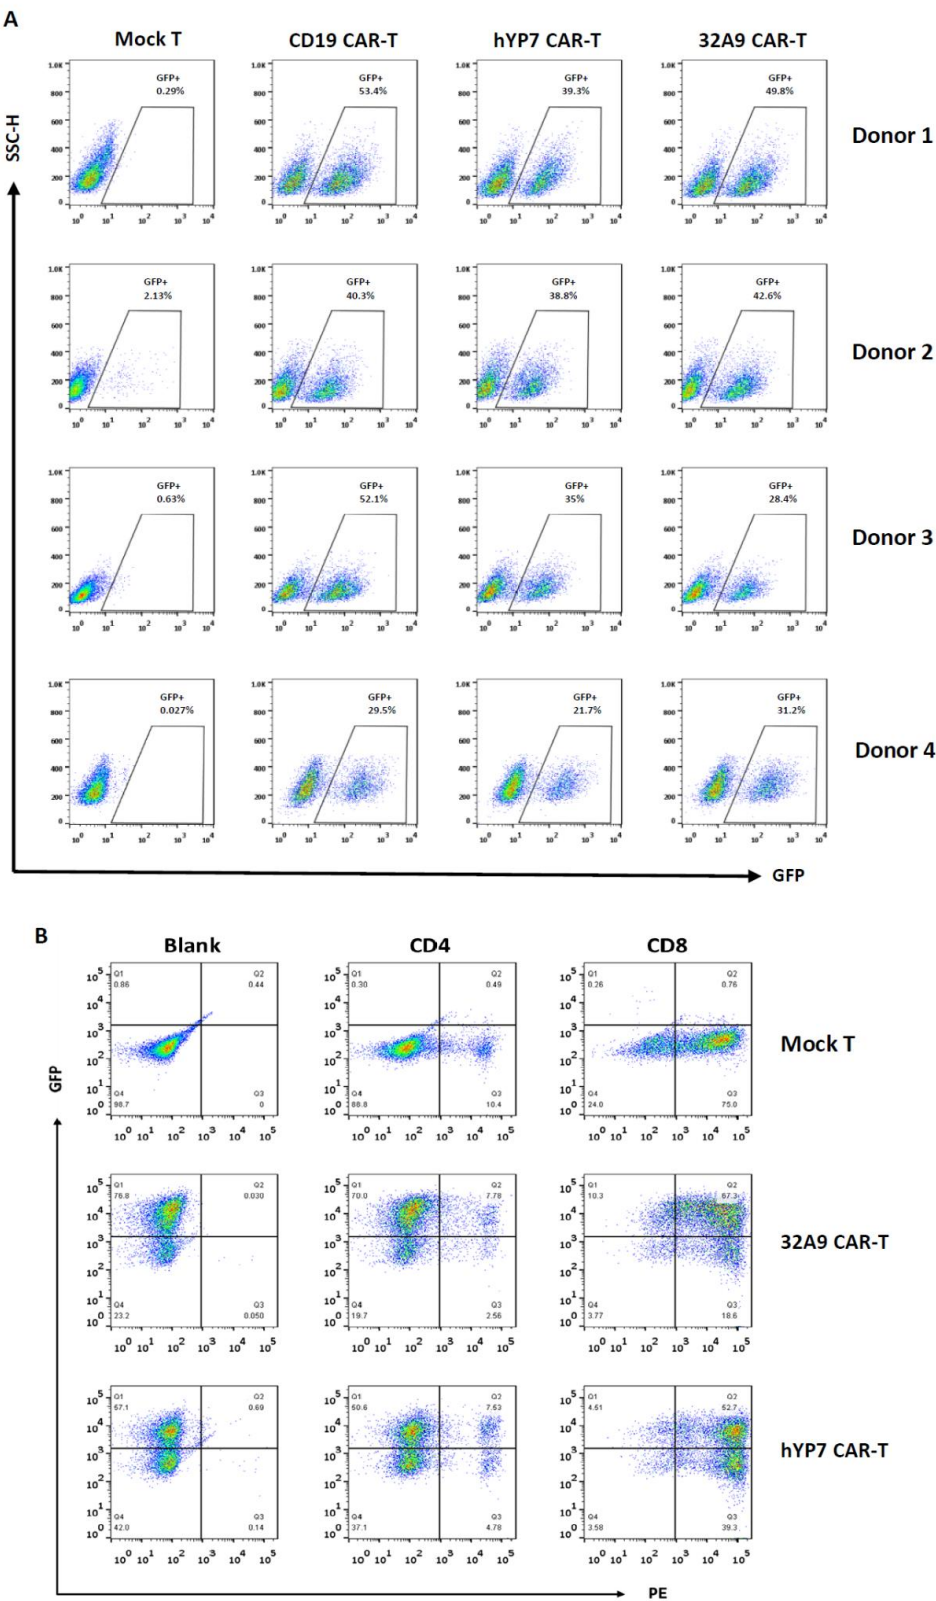

## Role of Shed Tumor Antigens in Immunotherapies

**Fig. S2. The transduction efficiency of CARs and the CD4/CD8 ration in the generated CAR T-cells.** (A) Flow cytometry to show the transduction efficiency of anti-GPC3 CARs and anti-CD19 CAR in T cells from 4 different donors. GFP-positive cells were gated as CAR-T cells. (B) Flow cytometry to detect CD4 and CD8 proportions in the generated T cell population.

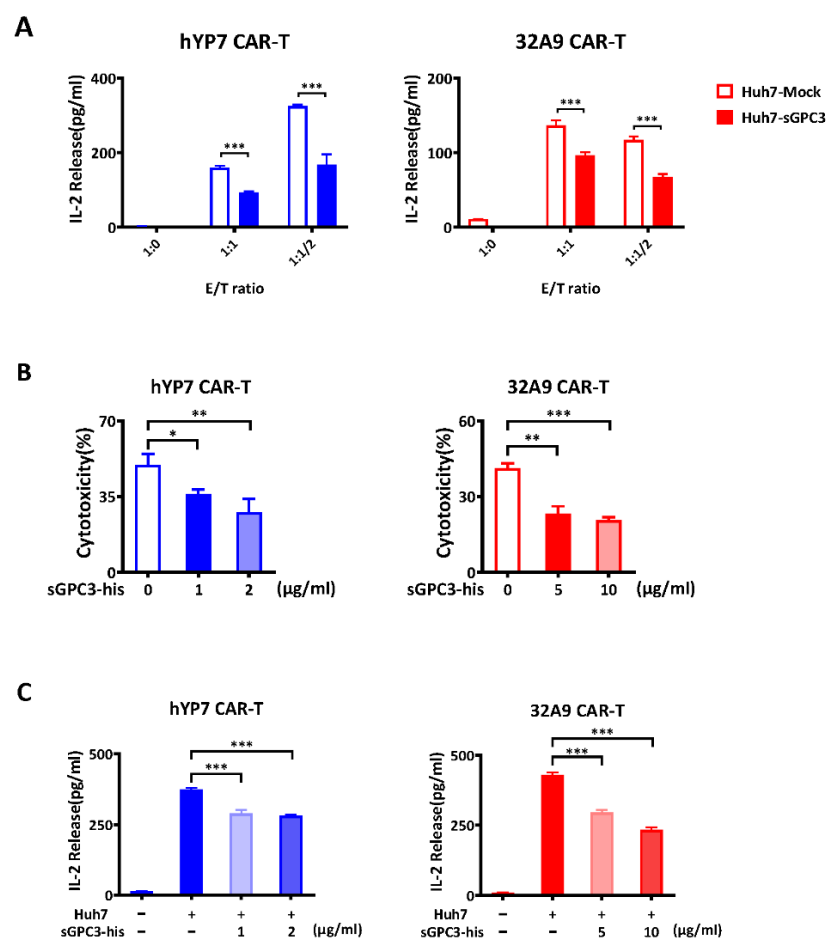

**Fig. S3. sGPC3 inhibits the activation of GPC3-specific CAR-T cells *in vitro*.** (A) Detection of IL-2 release in hYP7 CAR-T cells and 32A9 CAR-T cells targeting Huh7-Mock cells and Huh-7-sGPC3 cells for 12 hours at the indicated E/T ratio. GPC3-specific CAR-T cells targeted Huh-7 cells in the presence of the recombinant sGPC3

### Role of Shed Tumor Antigens in Immunotherapies

protein at an E/T ratio of 2:1 for 16 hours, then LDH assays to detect the cytotoxicity of GPC3-specific CAR-T cells (B) and ELISA to detect the secretion of IL-2 (C).

Values represent the mean  $\pm$  SD. \*\*\* $p < 0.001$  (two-tailed Student's t-test).

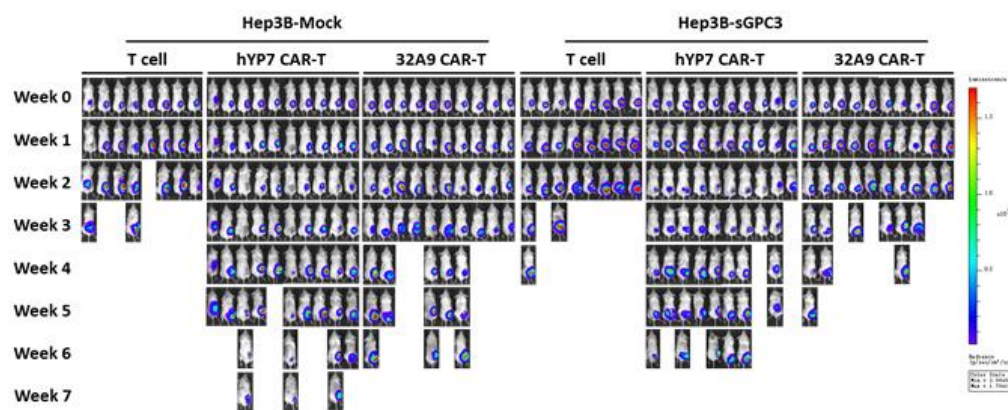

**Fig. S4. Weekly bioluminescence imaging of mice treated with hYP7 CAR-T cells and 32A9 CAR-T cells.** NCG mice with subcutaneous luciferase-expressing Hep3B-Mock or Hep3B-sGPC3 xenograft tumors were i.v. injected with 2 doses of CAR-T cells when the tumor size reached approximately 400 mm<sup>3</sup>.

Role of Shed Tumor Antigens in Immunotherapies

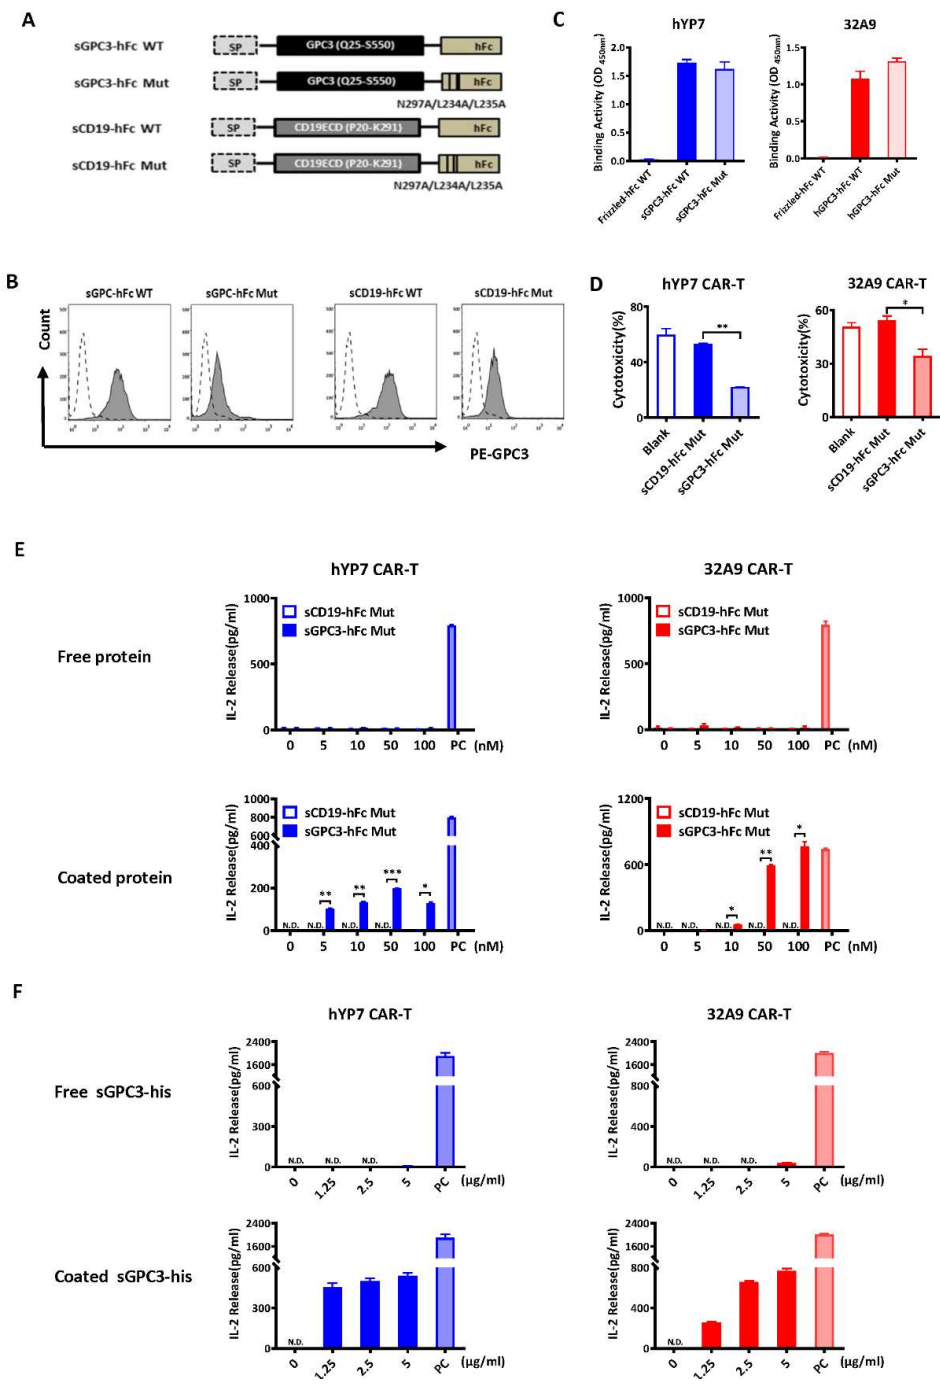

## Role of Shed Tumor Antigens in Immunotherapies

**Fig. S5. The effect of recombinant sGPC3 proteins on CAR-T cell cytotoxicity and activation.** (A) Schematic constructs of the recombinant sGPC3 protein and sCD19 protein with wild-type and mutant human Fc fragments. SP, signal peptide. (B) Flow cytometry to detect the binding properties of the recombinant proteins described in (A) (20 nM) with IFN- $\gamma$ -primed THP-1 monocytes. (C) ELISA for the comparison of the binding activities of hYP7 and 32A9 to sGPC3-hFc Mut or sGPC3-hFc WT. (D) LDH assays to detect the cytotoxicity of GPC3-specific CAR-T cells targeting Hep3B cells in the presence of 20  $\mu$ g/ml sGPC3-hFc Mut protein at an E/T ratio of 2.5:1 for 12 hours. (E-F) ELISA to measure the secretion of IL-2 in the culture supernatants of hYP7 CAR-T or 32A9 CAR-T cells treated with free or pre-coated recombinant sGPC3-hFc Mut protein (E) or sGPC3-his protein (F). CAR-T cells cocultured with Hep3B cells were used as positive controls. Values represent the mean  $\pm$  SD. \* $p$ <0.05; \*\* $p$ <0.01; \*\*\* $p$ <0.001 (two-tailed Student's t-test).

Role of Shed Tumor Antigens in Immunotherapies

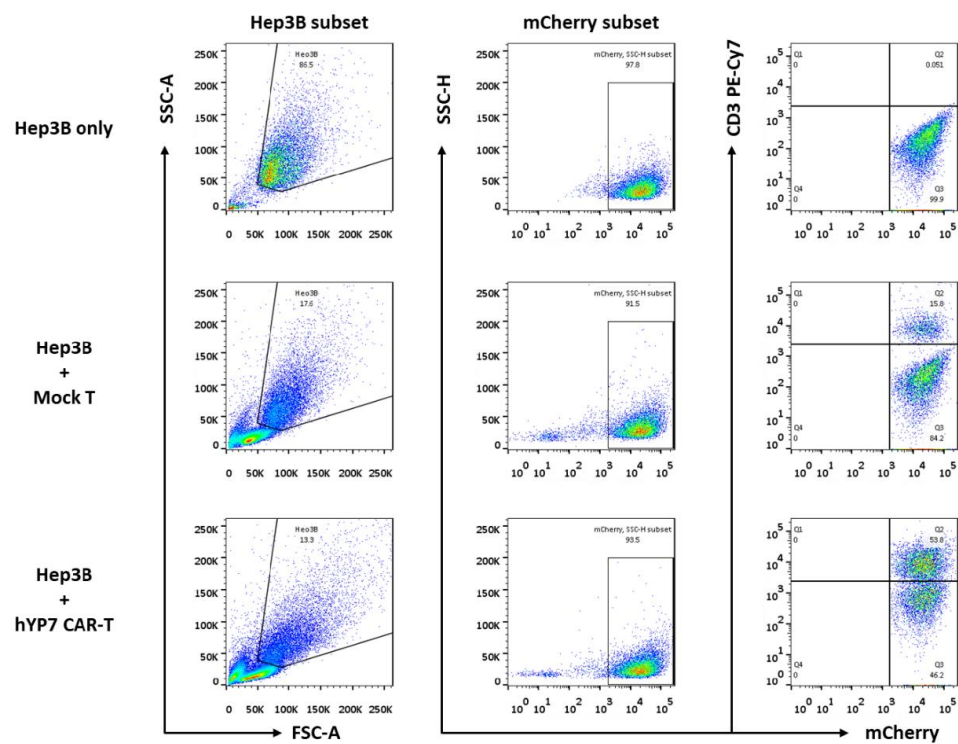

**Fig. S6. Gating strategy for analyzing the binding between GPC3-specific CAR-T cells and Hep3B cells.**
